# Supplementary material for: Controlled Measurement and Comparative Analysis of Cellular Components in E. coli Reveals Broad Regulatory Changes in Response to Glucose Starvation
Source: PLoS Comput Biol. 2015 Aug 14;11(8):e1004400. doi: 10.1371/journal.pcbi.1004400 (PMC4537216; doi:10.1371/journal.pcbi.1004400)
Supplement: S1 Table — (CSV) [file pcbi.1004400.s001.csv]

Proportionally controlled proteins
Annotation Cluster 1	Enrichment Score: 15.722412271963268
Category	Term	Count	%	PValue	Genes	List Total	Pop Hits	Pop Total	Fold Enrichment	Bonferroni	Benjamini	FDR
GOTERM_BP_FAT	GO:0018198~peptidyl-cysteine modification	10	3.4843205575	1.894906249166964E-16	RIMO	237	10	16709	70.5021097046	1.2945200467129325E-13	1.2945200467129325E-13	3.219646771412954E-13
GOTERM_BP_FAT	GO:0018197~peptidyl-aspartic acid modification	10	3.4843205575	1.894906249166964E-16	RIMO	237	10	16709	70.5021097046	1.2945200467129325E-13	1.2945200467129325E-13	3.219646771412954E-13
GOTERM_BP_FAT	GO:0018339~peptidyl-L-beta-methylthioaspartic acid biosynthetic process from peptidyl-aspartic acid	10	3.4843205575	1.894906249166964E-16	RIMO	237	10	16709	70.5021097046	1.2945200467129325E-13	1.2945200467129325E-13	3.219646771412954E-13
Annotation Cluster 2	Enrichment Score: 5.177276313087028
Category	Term	Count	%	PValue	Genes	List Total	Pop Hits	Pop Total	Fold Enrichment	Bonferroni	Benjamini	FDR
GOTERM_BP_FAT	GO:0044271~nitrogen compound biosynthetic process	39	13.5888501742	1.0437651241646452E-6	LYSA, PURT, PURR, UPP, THRA, NAPA, ILVE, SERS, BISC, GSS, METH, HEMB, ZNTA, TGT, DXS, ASNB, HEMN, ATPA, POTG, CYSJ, CYSH, PURK, THII, CYSE, CBL, TRPC, DAPA, HISI, TRPE, LEUC, AROH, LEUB, LEUA, RIBF, AVTA, AROB, MODE, FOLE, THID	237	1164	16709	2.362184088	6.083302770559795E-4	1.2169567147979343E-4	0.0015354866
GOTERM_BP_FAT	GO:0046394~carboxylic acid biosynthetic process	27	9.4076655052	4.6382701268757E-6	LYSA, PURR, THRA, ILVE, SERS, BISC, METH, FABH, ACCC, YIJC, ASNB, CYSJ, CYSH, SHIA, CYSE, CBL, TRPC, DAPA, TRPE, HISI, LEUC, AROH, LEUB, LEUA, AVTA, AROB, FOLE	237	685	16709	2.778915273	0.0027004649	4.5058474871861875E-4	0.0068232075
GOTERM_BP_FAT	GO:0016053~organic acid biosynthetic process	27	9.4076655052	5.018013385958349E-6	LYSA, PURR, THRA, ILVE, SERS, BISC, METH, FABH, ACCC, YIJC, ASNB, CYSJ, CYSH, SHIA, CYSE, CBL, TRPC, DAPA, TRPE, HISI, LEUC, AROH, LEUB, LEUA, AVTA, AROB, FOLE	237	688	16709	2.7667979099	0.002921234	4.178425572056721E-4	0.0073818162
GOTERM_BP_FAT	GO:0009309~amine biosynthetic process	24	8.362369338	1.453210622535094E-5	LYSA, POTG, CYSJ, PURR, THRA, CYSH, CBL, CYSE, ILVE, SERS, GSS, TRPC, DAPA, METH, TRPE, HISI, LEUC, AROH, LEUB, LEUA, AVTA, ASNB, AROB, FOLE	237	600	16709	2.8200843882	0.0084364909	9.409214432768431E-4	0.0213762565
GOTERM_BP_FAT	GO:0008652~cellular amino acid biosynthetic process	22	7.6655052265	3.6795883574977414E-5	LYSA, PURR, CYSJ, THRA, CYSH, CBL, CYSE, ILVE, SERS, TRPC, DAPA, METH, TRPE, HISI, LEUC, AROH, LEUB, LEUA, AVTA, ASNB, AROB, FOLE	237	550	16709	2.8200843882	0.0212239288	0.0015311405	0.0541172898
Annotation Cluster 3	Enrichment Score: 5.0019785746451575
Category	Term	Count	%	PValue	Genes	List Total	Pop Hits	Pop Total	Fold Enrichment	Bonferroni	Benjamini	FDR
GOTERM_BP_FAT	GO:0007049~cell cycle	13	4.5296167247	8.864638429033343E-7	FTSE, FTSK, XERC, MUKE, MUKB, MUKF, FTSN, FTSQ, MURE, MURG, FTSZ, MPL, MURA	237	143	16709	6.4092827004	5.166751268815828E-4	1.291938161273043E-4	0.0013040815
GOTERM_BP_FAT	GO:0051301~cell division	13	4.5296167247	1.0952645308712429E-5	FTSE, FTSK, XERC, MUKE, MUKB, MUKF, FTSN, FTSQ, MURE, MURG, FTSZ, MPL, MURA	237	182	16709	5.0358649789	0.0063650837	7.978599383196006E-4	0.016111381
GOTERM_BP_FAT	GO:0007059~chromosome segregation	5	1.7421602787	1.0159778181616482E-4	FTSK, MUKE, XERC, MUKB, MUKF	237	18	16709	19.5839193624	0.0575142846	0.0036953127	0.1493578708
Annotation Cluster 4	Enrichment Score: 3.7902178093615957
Category	Term	Count	%	PValue	Genes	List Total	Pop Hits	Pop Total	Fold Enrichment	Bonferroni	Benjamini	FDR
GOTERM_BP_FAT	GO:0042330~taxis	12	4.181184669	2.742947871446837E-7	FLGL, FLGK, FLGJ, FLGI, FLHA, DSBB, FLGA, FLHC, FLGG, FLGF, FLGE, FLHD	237	105	16709	8.0573839662	1.5990109727115343E-4	5.330320693841539E-5	4.0351816609218716E-4
GOTERM_BP_FAT	GO:0007610~behavior	12	4.181184669	2.742947871446837E-7	FLGL, FLGK, FLGJ, FLGI, FLHA, DSBB, FLGA, FLHC, FLGG, FLGF, FLGE, FLHD	237	105	16709	8.0573839662	1.5990109727115343E-4	5.330320693841539E-5	4.0351816609218716E-4
GOTERM_BP_FAT	GO:0007626~locomotory behavior	12	4.181184669	2.742947871446837E-7	FLGL, FLGK, FLGJ, FLGI, FLHA, DSBB, FLGA, FLHC, FLGG, FLGF, FLGE, FLHD	237	105	16709	8.0573839662	1.5990109727115343E-4	5.330320693841539E-5	4.0351816609218716E-4
GOTERM_BP_FAT	GO:0048870~cell motility	7	2.4390243902	1.3405813036999588E-4	FLGL, FLGK, FLGJ, FLGI, FLGG, FLGF, FLGE	237	56	16709	8.8127637131	0.0751846002	0.0043328709	0.1970336575
GOTERM_BP_FAT	GO:0001539~ciliary or flagellar motility	7	2.4390243902	1.3405813036999588E-4	FLGL, FLGK, FLGJ, FLGI, FLGG, FLGF, FLGE	237	56	16709	8.8127637131	0.0751846002	0.0043328709	0.1970336575
GOTERM_BP_FAT	GO:0051674~localization of cell	7	2.4390243902	1.3405813036999588E-4	FLGL, FLGK, FLGJ, FLGI, FLGG, FLGF, FLGE	237	56	16709	8.8127637131	0.0751846002	0.0043328709	0.1970336575
GOTERM_BP_FAT	GO:0006928~cell motion	7	2.4390243902	1.4808001828107376E-4	FLGL, FLGK, FLGJ, FLGI, FLGG, FLGF, FLGE	237	57	16709	8.6581538234	0.0827149856	0.0045337463	0.2176215914
GOTERM_BP_FAT	GO:0043064~flagellum organization	5	1.7421602787	0.0028507232	FLGK, FLGJ, FLGG, FLGF, FLHD	237	42	16709	8.3931082982	0.8106853943	0.0379662052	4.1127612088
GOTERM_BP_FAT	GO:0030030~cell projection organization	5	1.7421602787	0.0075335284	FLGK, FLGJ, FLGG, FLGF, FLHD	237	55	16709	6.4092827004	0.9878286986	0.0895366051	10.5281705386
GOTERM_BP_FAT	GO:0009296~flagellum assembly	3	1.0452961672	0.0872318301	FLGK, FLGJ, FLHD	237	35	16709	6.0430379747	1	0.4815661127	73.8869536305
GOTERM_BP_FAT	GO:0030031~cell projection assembly	3	1.0452961672	0.1472132937	FLGK, FLGJ, FLHD	237	48	16709	4.4063818565	1	0.6085043618	90.3930904421
Annotation Cluster 6	Enrichment Score: 3.136632364510789
Category	Term	Count	%	PValue	Genes	List Total	Pop Hits	Pop Total	Fold Enrichment	Bonferroni	Benjamini	FDR
GOTERM_BP_FAT	GO:0006790~sulfur metabolic process	15	5.2264808362	2.5357452517373072E-5	CYSJ, THRA, CYSH, THII, CBL, CYSE, CYSD, CYSC, CYSA, SERS, BISC, METH, DXS, THID, CYSN	237	265	16709	3.990685455	0.0146748416	0.0012312066	0.0372972214
GOTERM_BP_FAT	GO:0009070~serine family amino acid biosynthetic process	7	2.4390243902	1.9722308522571115E-4	CYSJ, PURR, THRA, CYSH, CYSE, CBL, SERS	237	60	16709	8.2252461322	0.1086270805	0.0057331225	0.2897456979
GOTERM_BP_FAT	GO:0044272~sulfur compound biosynthetic process	11	3.8327526132	3.7829234290848965E-4	METH, CYSJ, THRA, CYSH, THII, CYSE, CBL, DXS, SERS, BISC, THID	237	190	16709	4.0817010882	0.1979514699	0.0095448586	0.5550702433
GOTERM_BP_FAT	GO:0009069~serine family amino acid metabolic process	8	2.787456446	4.7703635508057347E-4	CYSJ, PURR, THRA, CYSH, GCVP, CYSE, CBL, SERS	237	98	16709	5.7552742616	0.2428383825	0.0110654644	0.6994844796
GOTERM_BP_FAT	GO:0000097~sulfur amino acid biosynthetic process	7	2.4390243902	6.193722235393461E-4	METH, CYSJ, THRA, CYSH, CYSE, CBL, SERS	237	74	16709	6.6691184856	0.3031644796	0.0137964779	0.9073083846
GOTERM_BP_FAT	GO:0000096~sulfur amino acid metabolic process	7	2.4390243902	0.0014505513	METH, CYSJ, THRA, CYSH, CYSE, CBL, SERS	237	87	16709	5.6725835395	0.5709944192	0.0232337676	2.1128358054
GOTERM_BP_FAT	GO:0019344~cysteine biosynthetic process	4	1.393728223	0.0056903302	CYSJ, CYSH, CYSE, CBL	237	26	16709	10.8464784161	0.9640971001	0.069771219	8.0523073881
GOTERM_BP_FAT	GO:0006534~cysteine metabolic process	4	1.393728223	0.0174934874	CYSJ, CYSH, CYSE, CBL	237	39	16709	7.2309856107	0.9999659936	0.1678407729	22.8660545747
Annotation Cluster 7	Enrichment Score: 2.968167724937097
Category	Term	Count	%	PValue	Genes	List Total	Pop Hits	Pop Total	Fold Enrichment	Bonferroni	Benjamini	FDR
GOTERM_BP_FAT	GO:0006418~tRNA aminoacylation for protein translation	9	3.1358885017	1.5479341369233827E-5	ALAS, PHES, LYSS, LYSU, ILES, LPLA, SERS	237	79	16709	8.0318859157	0.0089839271	9.02045498664128E-4	0.0227694607
GOTERM_BP_FAT	GO:0043038~amino acid activation	9	3.1358885017	1.5479341369233827E-5	ALAS, PHES, LYSS, LYSU, ILES, LPLA, SERS	237	79	16709	8.0318859157	0.0089839271	9.02045498664128E-4	0.0227694607
GOTERM_BP_FAT	GO:0043039~tRNA aminoacylation	9	3.1358885017	1.5479341369233827E-5	ALAS, PHES, LYSS, LYSU, ILES, LPLA, SERS	237	79	16709	8.0318859157	0.0089839271	9.02045498664128E-4	0.0227694607
GOTERM_BP_FAT	GO:0006399~tRNA metabolic process	15	5.2264808362	2.7574554274988853E-5	MIAA, GIDA, YLEA, ILES, SERS, ALAS, PHES, LYSS, YEED, LYSU, TGT, TRUD, LPLA	237	267	16709	3.96079268	0.0159476546	0.0012358654	0.0405576477
GOTERM_BP_FAT	GO:0034660~ncRNA metabolic process	17	5.9233449477	9.528919463650013E-5	MIAA, GIDA, YLEA, ILES, SERS, ALAS, PHES, LYSS, YEED, LYSU, TGT, TRUD, LPLA, YFGB, YCIL	237	377	16709	3.1791402254	0.0540411856	0.0036968994	0.1400897383
GOTERM_BP_FAT	GO:0009451~RNA modification	10	3.4843205575	0.0016614013	SELA, MIAA, GIDA, YLEA, RHLE, THII, TGT, PCNB, TRUD, YCIL	237	192	16709	3.6719848805	0.6206903878	0.0251879461	2.4164678638
GOTERM_BP_FAT	GO:0006400~tRNA modification	4	1.393728223	0.0507646936	GIDA, YLEA, TGT, TRUD	237	59	16709	4.7798040478	1	0.3441699611	53.5330668527
GOTERM_BP_FAT	GO:0008033~tRNA processing	6	2.0905923345	0.1322251064	MIAA, GIDA, YLEA, YEED, TGT, TRUD	237	190	16709	2.2263824117	1	0.5889588995	87.5863958341
GOTERM_BP_FAT	GO:0034470~ncRNA processing	8	2.787456446	0.1337093523	MIAA, GIDA, YLEA, YEED, TGT, TRUD, YFGB, YCIL	237	300	16709	1.8800562588	1	0.5855696864	87.8951107712
GOTERM_BP_FAT	GO:0006396~RNA processing	9	3.1358885017	0.1432191603	MIAA, GIDA, YLEA, YEED, TGT, PCNB, TRUD, YFGB, YCIL	237	363	16709	1.747986191	1	0.6013025231	89.7094787511
